# Supplementary material for: Identification of polysaccharide capsules among extensively drug-resistant genitourinary Haemophilus parainfluenzae isolates
Source: PubMed Central journal article supplement (PMC6418240; doi:10.1038/s41598-019-40812-2), 2019-03-14
Supplement: 41598_2019_40812_MOESM1_ESM.pdf [file 41598_2019_40812_MOESM1_ESM.pdf]

**Identification of polysaccharide capsules among extensively drug-resistant genitourinary *Haemophilus parainfluenzae* isolates**

Aida González-Díaz<sup>1,2</sup>, Fe Tubau<sup>1,2</sup>, Miguel Pinto<sup>3</sup>, Yanik Sierra<sup>1</sup>, Meritxell Cubero<sup>1,2</sup>, Jordi Càmarà<sup>1,2</sup>, Josefina Ayats<sup>1,2</sup>, Paula Bajanca-Lavado<sup>4</sup>, Carmen Ardanuy<sup>1,2\*</sup>, Sara Martí<sup>1,2\*</sup>.

**(A) Gene**

|                         | <i>bexA</i>  |             | <i>bexB</i>  |             | <i>bexC</i>  |             | <i>bexD</i>  |             | <i>xcsA</i>  |             | <i>xcsB</i>  |             | <i>xcsC</i>  |             | <i>xcsD</i>  |             | <i>hcsA</i>  |             | <i>hcsB</i>  |             |
|-------------------------|--------------|-------------|--------------|-------------|--------------|-------------|--------------|-------------|--------------|-------------|--------------|-------------|--------------|-------------|--------------|-------------|--------------|-------------|--------------|-------------|
|                         | Identity (%) | Length (bp) | Identity (%) | Length (bp) | Identity (%) | Length (bp) | Identity (%) | Length (bp) | Identity (%) | Length (bp) | Identity (%) | Length (bp) | Identity (%) | Length (bp) | Identity (%) | Length (bp) | Identity (%) | Length (bp) | Identity (%) | Length (bp) |
| <b>HPAR<sup>a</sup></b> |              | <b>654</b>  |              | <b>798</b>  |              | <b>1134</b> |              | <b>1185</b> |              | <b>939</b>  |              | <b>3717</b> |              | <b>1230</b> |              | <b>1122</b> |              | <b>2043</b> |              | <b>1221</b> |
| <b>Hia</b>              | 86.5         | 654         | 85.2         | 798         | 85.1         | 1134        | 91.2         | 1185        | 21.6         | 1425        | 9.9          | 1116        | 35.6         | 2340        | 12.8         | 381         | 94.2         | 2043        | 94.2         | 1227        |
| <b>Hib</b>              | 53.5         | 654         | 85.5         | 798         | 91.1         | 1134        | 91.1         | 1185        | 21.7         | 1425        | 10.3         | 1116        | 35.1         | 3648        | 21.1         | 1848        | 94.4         | 2043        | 94.4         | 1227        |
| <b>Hic</b>              | NA           | NA          | NA           | NA          | NA           | NA          | NA           | NA          | 91.0         | 939         | 58.6         | 3672        | 95.6         | 1230        | 96.7         | 1118        | NA           | NA          | NA           | NA          |
| <b>Hid</b>              | NA           | NA          | NA           | NA          | NA           | NA          | NA           | NA          | 27.7         | 1125        | 11.4         | 1263        | 35.9         | 2943        | 20.0         | 1968        | NA           | NA          | NA           | NA          |
| <b>Hie</b>              | 91.2         | 654         | 95.2         | 798         | 97.0         | 1134        | 87.8         | 1287        | 30.8         | 1125        | 11.8         | 1266        | 33.5         | 2976        | 27.1         | 1461        | 82.7         | 1788        | 91.2         | 1263        |
| <b>Hif</b>              | 89.7         | 654         | 95.1         | 798         | 97.1         | 1134        | 95.4         | 1185        | 78.7         | 1095        | 25.5         | 2664        | 32.2         | 1140        | -            | -           | 94.9         | 2043        | 89.9         | 1221        |

**(B) Protein**

|                         | <b>BexA</b>  |             | <b>BexB</b>  |             | <b>BexC</b>  |             | <b>BexD</b>  |             | <b>XcsA</b>  |             | <b>XcsB</b>  |             | <b>XcsC</b>  |             | <b>XcsD</b>  |             | <b>HcsA</b>  |             | <b>HcsB</b>  |             |
|-------------------------|--------------|-------------|--------------|-------------|--------------|-------------|--------------|-------------|--------------|-------------|--------------|-------------|--------------|-------------|--------------|-------------|--------------|-------------|--------------|-------------|
|                         | Identity (%) | Length (AA) | Identity (%) | Length (AA) | Identity (%) | Length (AA) | Identity (%) | Length (AA) | Identity (%) | Length (AA) | Identity (%) | Length (AA) | Identity (%) | Length (AA) | Identity (%) | Length (AA) | Identity (%) | Length (AA) | Identity (%) | Length (AA) |
| <b>HPAR<sup>a</sup></b> |              | 217         |              | 265         |              | 377         |              | 395         |              | 313         |              | 1239        |              | 410         |              | 374         |              | 681         |              | 407         |
| <b>Hia</b>              | 97.2         | 217         | 93.5         | 265         | 90.9         | 377         | 93.4         | 395         | <1           | 313         | <1           | 372         | <1           | 780         | <1           | 127         | 95.7         | 681         | 87.6         | 409         |
| <b>Hib</b>              | 97.2         | 217         | 94.7         | 265         | 94.1         | 377         | 93.0         | 395         | <1           | 475         | <1           | 372         | <1           | 1216        | <1           | 616         | 96.1         | 681         | 88.7         | 409         |
| <b>Hic</b>              | NA           | NA          | NA           | NA          | NA           | NA          | NA           | NA          | 91.3         | 475         | 48.5         | 1224        | 95.8         | 410         | TRUNCATED    |             | NA           | NA          | NA           | NA          |
| <b>Hid</b>              | NA           | NA          | NA           | NA          | NA           | NA          | NA           | NA          | <1           | 313         | <1           | 421         | <1           | 981         | <1           | 656         | NA           | NA          | NA           | NA          |
| <b>Hie</b>              | 96.3         | 217         | 97.7         | 265         | 97.1         | 377         | 96.7         | 429         | <1           | 375         | <1           | 422         | <1           | 992         | <1           | 487         | 83.7         | 596         | 90.9         | 421         |
| <b>Hif</b>              | 95.9         | 217         | 97.3         | 265         | 98.4         | 377         | 97.9         | 395         | 76.5         | 375         | 20.0         | 888         | <1           | 380         | -            | -           | 96.3         | 681         | 90.1         | 407         |

**Supplementary Table 1.** Capsular operon identity. The number of identical bases/amino acids divided by the length of the longest gene (A) and protein (B) between genes/proteins from *H. parainfluenzae* and those from the six *H. influenzae* serotypes are expressed in percentages. Gene length is expressed in base pairs (bp) and protein length in the number of amino acids (AA).

<sup>a</sup> Capsular operons from *H. influenzae* serotypes a-f are abbreviated as Hia-Hif, while that from *H. parainfluenzae* is abbreviated as HPAR.

NA, no available sequence in NCBI. -, gene/protein does not exist in the operon.
